# Supplementary material for: Knowledge, attitudes, and practices about dengue fever among the population in Hodeidah, Yemen
Source: Research Square preprint supplement (doi:10.21203/rs.3.rs-8507909/v1), 2026-01-09
Supplement: Supplementary file 1 [file 6132d82c683ba7024946935e.docx]

| **Table 2: Knowledge about Dengue/DHF of the study participants, Hodeidah Governorate, 2019** | |
| --- | --- |
| **Knowledge items Frequency, %= n(%)** | |
| **Dengue fever signs and symptoms**  Headache  Fever  muscle pains  joint pains  pain behind the eyes  skin rash  nausea and vomiting  Abdominal pain  General weakness  Do not know | 285(67.5)  342(81.0)  150(35.5)  205(48.6)  108(25.6)  97(23.0)  172(40.8)  85(20.1)  165(39.1)  57(13.5) |
| **dengue hemorrhagic fever signs and symptoms**  Purpura  Epistaxis  Petechia  Blood in stool  Vomiting of blood  Blood in urine  Do not know | 34(8.1)  53(12.6)  15(3.6)  34(8.1)  38(9.0)  23(5.5)  337(79.9) |
| **Mode of transmission**  Mosquito bite  Direct contact  Food and water  Flies  Do not know | 344(81.5)  100(23.7)  89(21.1)  137(32.5)  64(15.2) |
| **breeding place of mosquitos**  Water storage container with cover  Water storage container without cover  Stagnant water in old tyres and trash cans  Stagnant water in air conditioner containers | 32(7.6)  375(88.9)  367(87.0)  240(56.9) |
| **biting time of Mosquitos**  Day time  Sun raise  Sun set  Night  Both day time and night | 49(11.6)  64(15.2)  114(27.0)  246(58.3)  131(31.0) |
| **Knowledge about Dengue Prevention**  Mosquito that transmit dengue fever prefer indoor houses and buildings.  Mosquitoes breed in standing water.  Insecticide sprays reduce mosquitoes and prevent dengue .  Clean Stagnant water is the main source for mosquito breeding.  Covering water containers reduces mosquitoes.  Any standing water in the house (e.g., unsealed containers, plant and flower pots and air condition water) are the mosquito breeding places | 260(61.6)  386(91.5)  383(90.8)  155(36.7)  392(92.9)  385(91.2) |
| **Knowledge about treatment**  Aspirin is the drug used for dengue treatment  Adequate liquid intake to relief symptom of dengue  Taking rest during dengue infection | 112(26.5)  297(70.4)  214(50.7) |

| **Table 3: Attitude toward Dengue of the study participants, Hodeidah Governorate, 2019** | | | |
| --- | --- | --- | --- |
| **Attitude items** | **agree n (%)** | **disagree n (%)** | **Not sure n (%)** |
| 1. DF is considered a serious disease | 393 (93.1) | 3(0.7) | 26(6.2) |
| 1. DF is a preventable disease | 344(81.5) | 9(2.1) | 54(12.8) |
| 1. Your local community is at risk of DF | 392(92.9) | 35(8.3) | 65(15.4) |
| 1. The risk of getting dengue fever among men and women is not the same | 311(73.7) | 135(32.0) | 196(46.4) |
| 1. The best way to prevent people from getting dengue fever is to control mosquitoes | 286(67.8) | 12(2.8) | 66(15.6) |
| 1. If my family member has symptoms of dengue fever, I will bring him/her to see a doctor for immediate treatment. | 377(89.3) | 7(1.7) | 23(5.5) |
| 1. It is not necessary to seek immediate treatment for dengue fever as there is no cure for it. | 350(82.9) | 55(13.0) | 56(13.3) |
| 1. I am at risk of dengue fever | 366(86.7) | 34(8.1) | 102(24.2) |
| 1. Communities should actively participate in controlling the vectors of dengue fever | 271(64.2) | 14(3.3) | 31(7.3) |
| 1. Sleeping under a bed net can help prevent DF | 362(85.8) | 20(4.7) | 52(12.3) |
| 1. Controlling the breeding places of mosquito is a good strategy to prevent DF | 91(21.6) | 5(1.2) | 51(12.1) |
| 1. Elimination of breeding places is the responsibility of public health staff only | 344(81.5) | 101(23.9) | 50(11.8) |
| 1. Community members have an important role in the prevention of dengue fever | 392(92.9) | 26(6.2) | 34(8.1) |

| **Table 4: Dengue practices and controls among study participants, Hodeidah Governorate, 2019.** | | |
| --- | --- | --- |
| **practices items** | **Yes n (%)** | **No n (%)** |
| 1. Do you cover water containers at home | 355(84.1) | 67(15.9) |
| 1. Do you use insecticide sprays to reduce mosquitoes | 152(36.0) | 270(64.0) |
| 1. Do you cover your body with cloths | 190(45.0) | 232(55.0) |
| 1. Do you frequently clean water filled containers and diches around the house | 345(81.8) | 77(18.2) |
| 1. Do you cover your water tank immediately after using it | 369(87.4) | 53(12.6) |
| 1. Do you eliminate stagnant water around your house to reduce mosquitoes and prevents dengue | 279(66.1) | 143(33.9) |
| 1. Do you use window screens to reduce mosquitoes | 195(46.2) | 227(53.8) |
| 1. Do you use door screen to reduce mosquitoes | 122(28.9) | 300(71.1) |
| 1. Do you use mosquito repellents/creams | 149(35.3) | 273(64.7) |
| 1. Do you participate ‘clean our surroundings’ activities or campaigns to help prevent dengue fever in your community | 109(25.8) | 313(74.2) |
| 1. Do you use smoke to drive away mosquitoes | 233(55.2) | 189(44.8) |
| 1. Do you cut trees/vegetation surrounding your house to reduce mosquitoes and prevents dengue | 172(40.8) | 250(59.2) |
| 1. Do you usually visit health center/unit when you feel sick | 345(81.8) | 77(18.2) |
| 1. Do you sleeping under a mosquito net during the day? | 175(41.5) | 247(58.5) |
| 1. Do you check for Aedes larvae in water of cans and bottles around home | 147(34.8) | 275(65.2) |
